# Supplementary material
Source: PubMed Central journal article supplement (PMC3259876)
Supplement: M805807200_1.pdf [file M805807200_1.pdf]

## Supplemental Data

### Supplementary Experimental Procedures

#### Escherichia coli strains.

**TB1** - F<sup>-</sup> *ara*, (*lac-proAB*), [*80dlac*, (*lacZ*)M15] *rpsL*(Str<sup>R</sup>), *thi*, *hsdR* (1), obtained from Dr A.J.Lloyd. **Top10 F** - *mcrA* Δ(*mrr-hsdRMS-mcrBC*) φ80*lacZ*ΔM15 Δ*lacX74* *deoR* *recA1* *araD139* Δ (*ara-leu*) 7697 *galU* *galK* *rpsL* (Str<sup>R</sup>) *endA1* *nupG* (2), obtained from Invitrogen. **BL21 Star (λDE3)** - F<sup>-</sup> *ompT* *hsdS<sub>B</sub>* (*r<sub>B</sub><sup>-</sup>* *m<sub>B</sub><sup>-</sup>*) *gal* *dcm* *rne131* (λDE3) (3), obtained from Dr D. I. Roper. **C41 (DE3)** - derivative of *E. coli* BL21(λDE3): F<sup>-</sup> *ompT* *hsdS<sub>B</sub>* (*r<sub>B</sub><sup>-</sup>* *m<sub>B</sub><sup>-</sup>*) *gal* *dcm* (DE3) (4). **B834** - F<sup>-</sup> *ompT* *hsdS<sub>B</sub>*(*r<sub>B</sub><sup>-</sup>* *m<sub>B</sub><sup>-</sup>*) *gal* *dcm* *met* (DE3) (5).

#### Escherichia coli plasmids.

**pBADM41** - a vector carrying ampicillin resistance used for cloning PCR products for expression of maltose binding protein (MBP) fusion proteins where is also present an N-terminal hexa-histidine tag; obtained from Dr D. I. Roper. **pET33b** - a vector carrying a T7 RNA polymerase promoter and a multiple cloning site. pET33b also carries kanamycin resistance used for cloning PCR products for expression of proteins with a hexa-his tag; obtained from Novagen. **pMW172** - a vector carrying ampicillin resistance used for cloning PCR products for native expression of proteins (6). **pG-KJE8** - A vector carrying inducible (by L-Arabinose and tetracycline) chaperones genes as *dnaK*, *dnaJ*, *grpE*, *groES*, *groEL*. pG-KJE8 also carry chloramphenicol resistance; obtained from Dr D. I. Roper. **pRARE** - a vector that encode tRNA for the rare in *E. coli* codons AGA, AGG (Arg), GGA (Gly), AUA (Ile), CUA (Leu), CCC (Pro). pRARE also carries chloramphenicol resistant; obtained from Novagen. **pRARE2** - a vector that encode tRNA for the rare in *E. coli* codons AGA, AGG and CGG (Arg), GGA (Gly), AUA (Ile), CUA (Leu), CCC (Pro). pRARE also carries chloramphenicol resistant; obtained from Novagen.

## Supplementary Figure Legends

- Figure S1. Mass spectroscopic analysis of UDP-MurNAc-hexapeptide (L-Ala).** (a) Structures and fragmentation pattern of UDP-MurNAc-pentapeptide and UDP-MurNAc-hexapeptide (L-Ala). The UDP-MurNAc-pentapeptide structure shows the origin of fragment A and B. Fragment C and D are the result of double cleavage event shown in the UDP-MurNAc-hexapeptide (L-Ala) structure. (b) Comparison of positive ion peptide fragmentation spectra of UDP-MurNAc-pentapeptide (top) and UDP-MurNAc-hexapeptide (L-Ala) (bottom). Peptide aminoacyl residues are stated in single letter code: A = L- or D-Ala; E = D-Glu; K = L-Lys; (A) = branched L-Ala attached to  $\epsilon$ -NH<sub>2</sub> of L-Lysine. The circled ions (A, B, C and D) confirm that the L-alanine has been attached to the  $\epsilon$ -NH<sub>2</sub> of L-lysine of the UDP-MurNAc-pentapeptide. The C ion at  $m/z = 400.23$  represents the  $\gamma$ -D-Glu-L-Lys-(L-Ala)-D-Ala that differs from ion A,  $\gamma$ -D-Glu-L-Lys-D-Ala-D-Ala ( $m/z = 418.2570$ ). The ion D at  $m/z = 271.18$  represent the L-Lys-(L-Ala)-D-Ala (in brackets the branched L-alanine attached to  $\epsilon$ -NH<sub>2</sub> of L-Lys) that differs from ion B, L-Lys-D-Ala-D-Ala ( $m/z = 289.21$ ).
- Figure S2. Mass spectroscopic analysis of UDP-MurNAc-hexapeptide (L-Ser).** (a) Structures and fragmentation pattern of UDP-MurNAc-pentapeptide and UDP-MurNAc-hexapeptide (L-Ser). Structure I shows the origin of fragment A and B. Fragment C and D are the result of double cleavage event shown in structure II. (b) Positive ion MS/MS fragmentation spectra. Peptide aminoacyl residues are stated in single letter code: A = L- or D-Ala; E = D-Glu; K = L-Lys; (S) = branched L-Ser attached to  $\epsilon$ -NH<sub>2</sub> of L-Lysine. All the ions containing L-serine are associated with the L-lysine of the UDP-MurNAc-pentapeptide, fragments A-D are an example.

## Supplementary Table Legend

**Table S1.** **Primers used to amplify and sequence murN Pn16 and 159 for cloning into pBADM-41.** The nucleotides in bold type indicate the restriction enzyme site and tags added to the 5' end of the primers. The nucleotides in bold underlined type represent the restriction sites used for cloning. The nucleotides in red type represent the stop codon. Table S1 also shows the MBP-Fw and MBP-Rv primers used to sequence the plasmid insert. The PCR annealing temperature (Temp) used are also shown.

### Supplementary References

1. Johnston, T. C., Thompson, R. B., and Baldwin, T. O. (1986) *J Biol Chem* **261**(11), 4805-4811
2. Grant, S. G., Jessee, J., Bloom, F. R., and Hanahan, D. (1990) *Proc Natl Acad Sci U S A* **87**(12), 4645-4649
3. Lopez, P. J., Marchand, I., Joyce, S. A., and Dreyfus, M. (1999) *Mol Microbiol* **33**(1), 188-199
4. Miroux, B., and Walker, J. E. (1996) *Journal of molecular biology* **260**(3), 289-298
5. Leahy, D. J., Hendrickson, W. A., Aukhil, I., and Erickson, H. P. (1992) *Science (New York, N.Y)* **258**(5084), 987-991
6. Way, M., Pope, B., Gooch, J., Hawkins, M., and Weeds, A. G. (1990) *The EMBO journal* **9**(12), 4103-4109

## Supplementary Figures

Figure S1

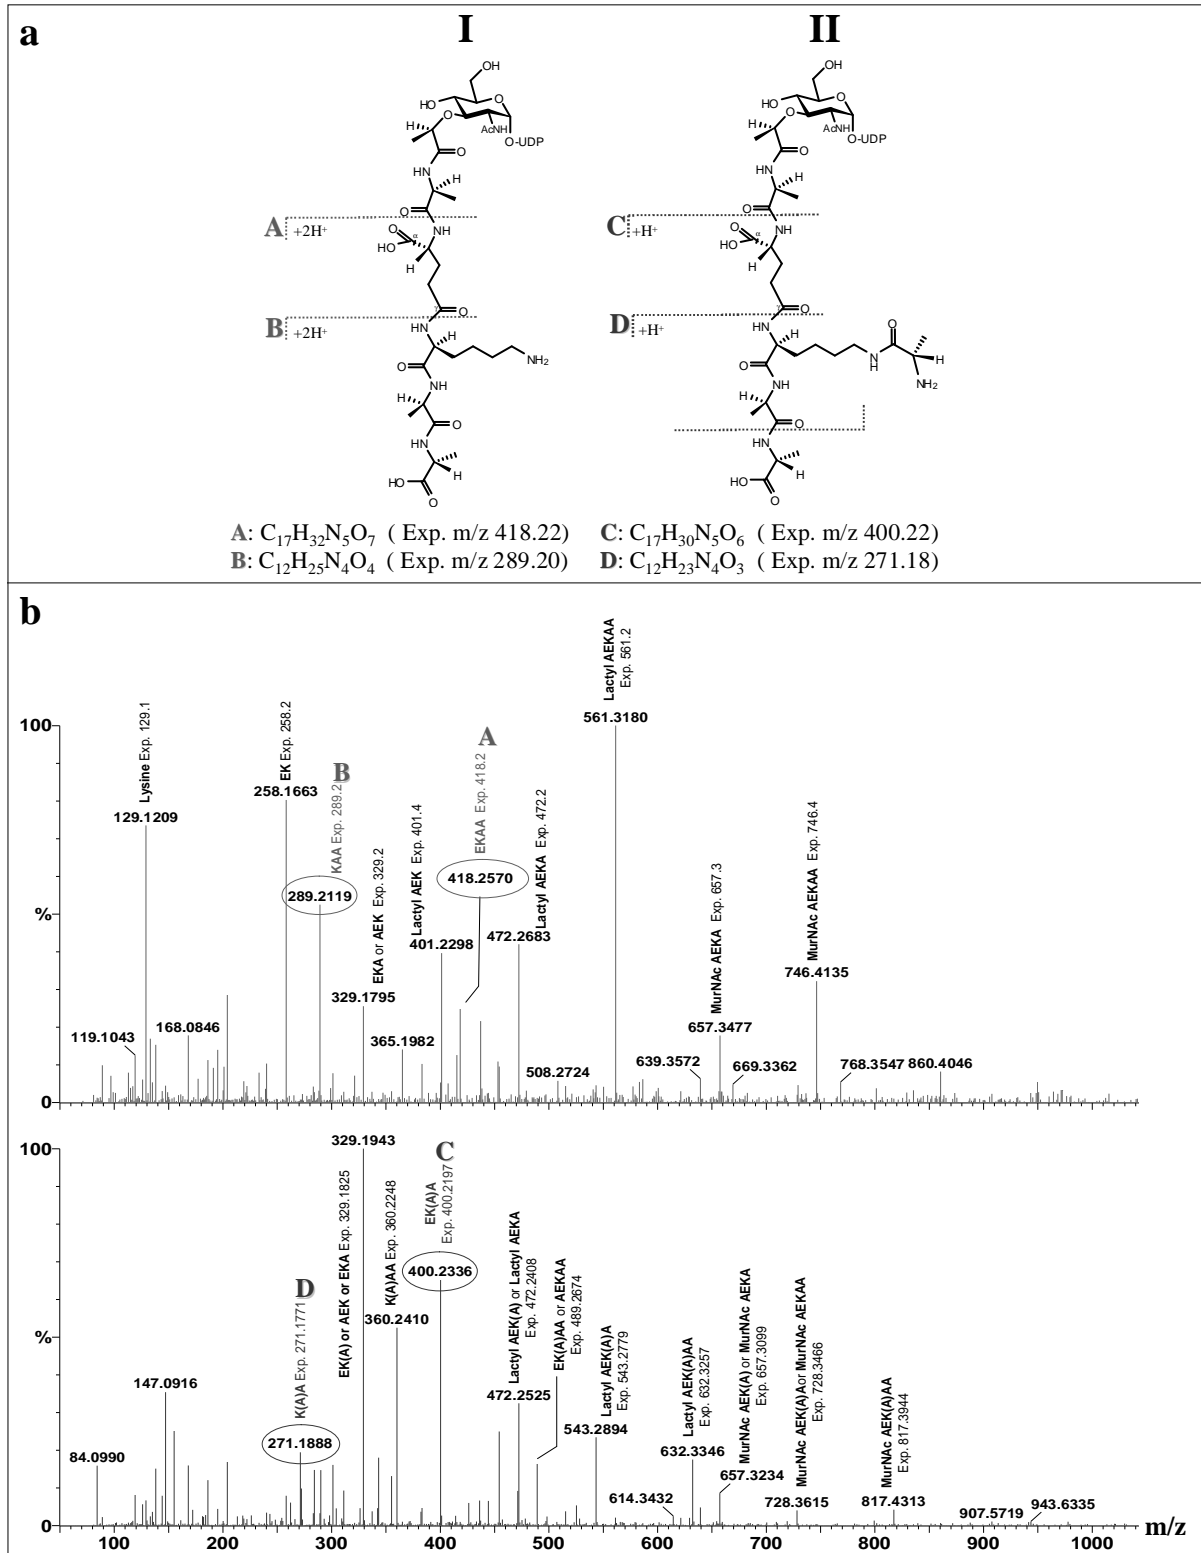

Figure S2

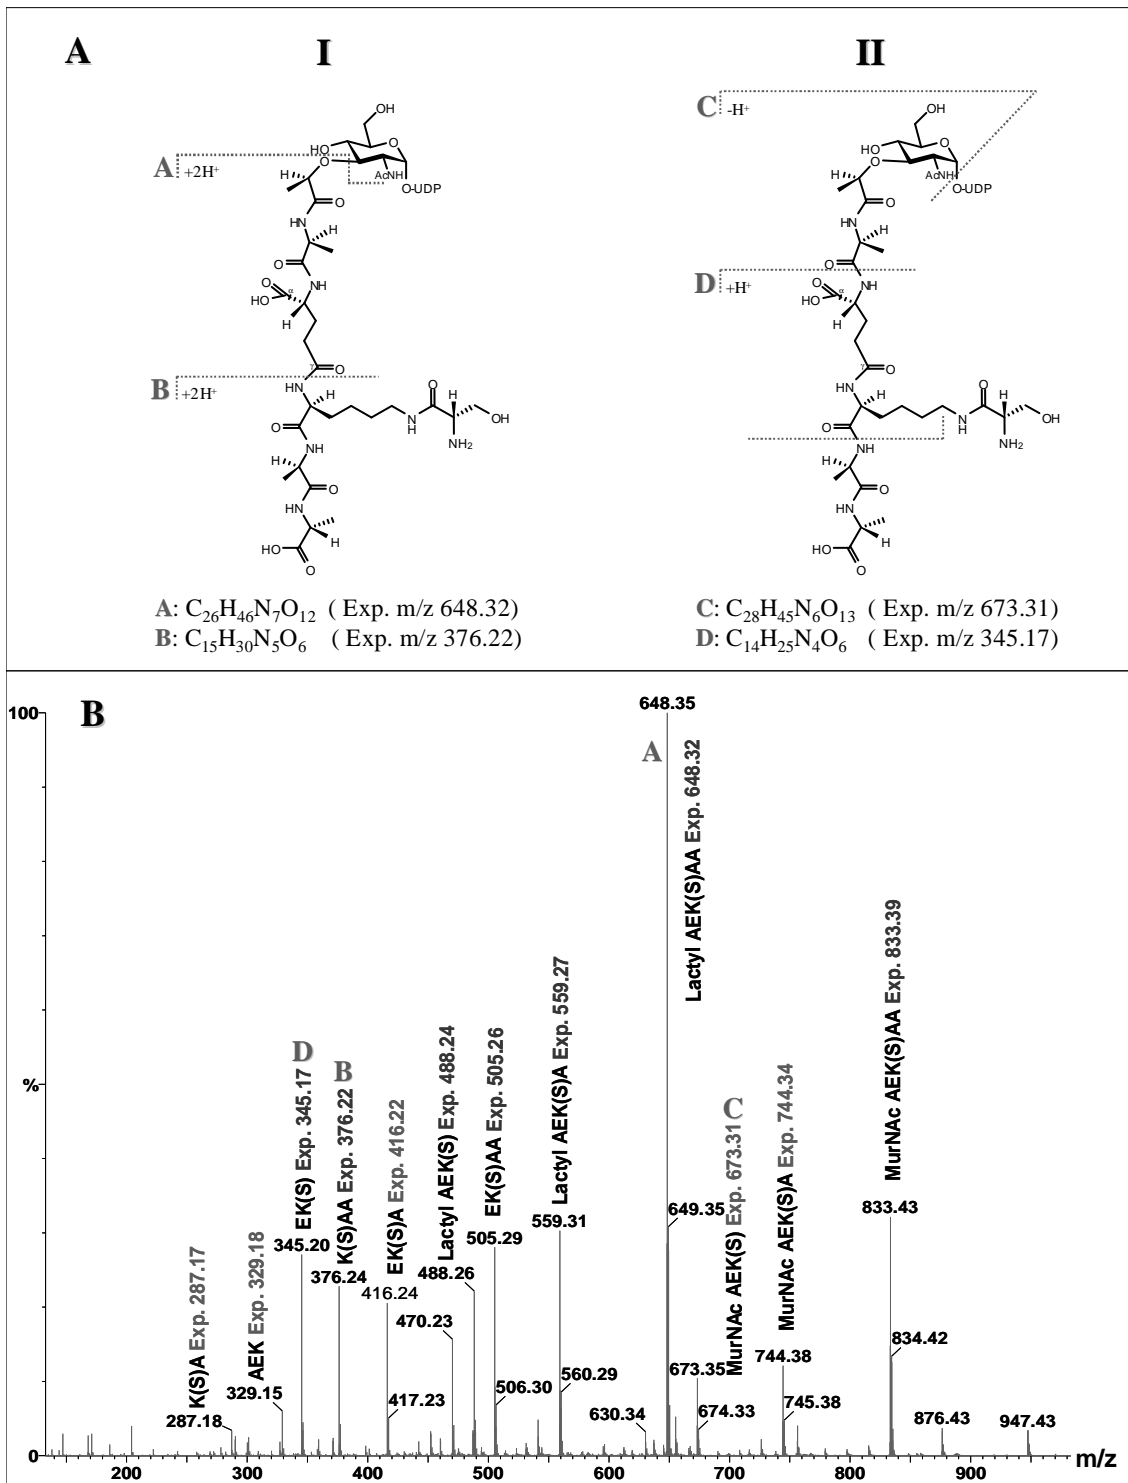

## Supplementary Table

Table S1

| <b>Name of Primer</b>   | <b>Primer Sequence</b>                          | <b>PCR Anneal Temp (°C)</b> |
|-------------------------|-------------------------------------------------|-----------------------------|
| <i>murN-NcoI</i> Fw     | 5' CATG <u>CCATGG</u> CACTAACAACACTCA 3'        | 50                          |
| <i>MBP-murM-XhoI</i> Rv | 5' CCCG <u>CTCGAG</u> TAAACGTCCTACTATTTTTTTG 3' | 50                          |
| MBP Fw                  | 5' CTGAAAGACGCGCAGACTAATC 3'                    | 55                          |
| <i>MBP</i> Rv           | 5' CAGACCGCTTCTGCGTTCTG 3'                      | 55                          |
